# Supplementary material for: A multi-step classifier addressing cohort heterogeneity improves performance of prognostic biomarkers in three cancer types
Source: PubMed Central journal article supplement (PMC5356843; doi:10.18632/oncotarget.13203), 2016-08-11
Supplement: oncotarget-08-2807-s001.pdf [file oncotarget-08-2807-s001.pdf]

## A multi-step classifier addressing cohort heterogeneity improves performance of prognostic biomarkers in three cancer types

### SUPPLEMENTARY TABLES

Supplementary Table S1: Details of the patients and variables used in analysis for the three cancer cohorts.

See Supplementary File 1

Supplementary Table S2: Sensitivity and specificity for predicting good prognosis for melanoma cohort

| <i>Melanoma</i>    | <i>Gene expression</i> | <i>Clinical</i> | <i>Prevalidation</i> | <i>Random forest</i> | <i>Two stage</i> |
|--------------------|------------------------|-----------------|----------------------|----------------------|------------------|
| <i>Sensitivity</i> | 0.69                   | 0.75            | 0.79                 | 0.7                  | 0.71             |
| <i>Specificity</i> | 0.73                   | 0.57            | 0.60                 | 0.56                 | 0.76             |

Supplementary Table S3: Sensitivity and specificity for predicting good prognosis for breast cancer cohort

| <i>Breast</i>      | <i>Gene expression</i> | <i>Clinical</i> | <i>Prevalidation</i> | <i>Random forest</i> | <i>Two stage</i> |
|--------------------|------------------------|-----------------|----------------------|----------------------|------------------|
| <i>Sensitivity</i> | 0.42                   | 0.95            | 0.82                 | 0.76                 | 0.80             |
| <i>Specificity</i> | 0.48                   | 0.00            | 0.03                 | 0.27                 | 0.71             |

Supplementary Table S4: Sensitivity and specificity for predicting good prognosis for colon cancer cohort

| <i>Colon</i>       | <i>Gene expression</i> | <i>Clinical</i> | <i>Prevalidation</i> | <i>Random forest</i> | <i>Two stage</i> |
|--------------------|------------------------|-----------------|----------------------|----------------------|------------------|
| <i>Sensitivity</i> | 0.63                   | 0.67            | 0.60                 | 0.67                 | 0.76             |
| <i>Specificity</i> | 0.54                   | 0.53            | 0.51                 | 0.62                 | 0.68             |
